# Supplementary material for: Manganese Oxide Biomineralization Provides Protection against Nitrite Toxicity in a Cell-Density-Dependent Manner
Source: PubMed Central journal article supplement (PMC6328764; doi:10.1128/aem.02129-18), 2019-01-09
Supplement: AEM.02129-18-s0001.pdf [file AEM.02129-18-s0001.pdf]

1 **Manganese oxide biomineralization is a social trait protecting**  
2 **against nitrite toxicity.**

3

4 Christian Zerfaß<sup>a,b</sup>, Joseph A. Christie-Oleza<sup>a,b</sup>, and Orkun S. Soyer<sup>a,b,\*</sup>

5 <sup>a</sup> School of Life Sciences, BBSRC/EPSRC Warwick Integrative Synthetic Biology Centre (WISB),  
6 University of Warwick, Coventry, CV4 7AL, UK.

7 <sup>b</sup> Warwick Integrative Synthetic Biology Centre (WISB), University of Warwick, Coventry, CV4  
8 7AL, UK.

9

10

11

### **Supplementary Information**

12 This supplementary text comprises the supplementary figures and table referred to in the  
13 main text.

14

15 **Supplementary Table:**

16

| Protein Name                          | UniProt Accession Number |
|---------------------------------------|--------------------------|
| Catalase-peroxidase                   | A6FK08                   |
| Cytochrome c peroxidase               | A6FV81                   |
| Glutathione peroxidase                | A6FTQ6                   |
| Alkyl hydroperoxide reductase AhpD    | A6FTV0                   |
| Animal haem peroxidase                | A6FV45                   |
| Heme peroxidase                       | A6FKA4                   |
| Heme Peroxidase                       | A6FV44                   |
| Animal haem peroxidase                | A6FKA5                   |
| Animal haem peroxidase                | A6FKA6                   |
| Hemolysin-type calcium-binding region | A6FKB3                   |
| Hemolysin-type calcium-binding region | A6FV55                   |
| Hemolysin-type calcium-binding region | A6FN32                   |

17 **Table S1.** List of AzwK-3b proteins with predicted peroxidase activity. The uniprot database  
 18 ([www.uniprot.org](http://www.uniprot.org)) was queried for “peroxidase” in *Roseobacter sp.* AzwK-3b, organism ID  
 19 351016, Proteome UP000004119. Note that this dataset is derived from an unassembled  
 20 whole genome shotgun sequencing according to the uniprot homepage information, and  
 21 hence the analysis presented here shall serve as an orientation. In the table, the protein  
 22 names of interest (i.e. associated peroxidase activity predicted) and uniprot accession  
 23 numbers of the entries are listed.

24

25 **Supplementary Figures:**

26

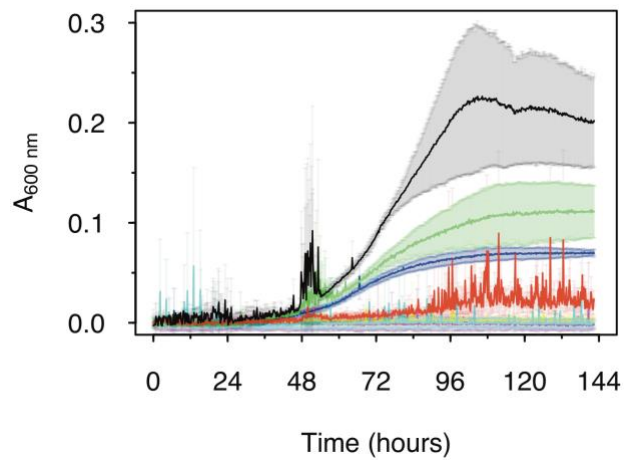

27

28 **Figure S1.** Vitamin-dependance of *Roseobacter sp. AzwK-3b*. Growth curves for AzwK-3b are  
29 shown for modified artificial sea water media (see Table 1) supplemented with different  
30 vitamin cocktails; a five vitamin cocktail with Pyridoxine, Riboflavin, Biotin, Thiamine, and  
31 Nicotinic acid (black curve), the same but without Pyridoxine (green), Riboflavin (blue), or  
32 Biotin (red). When Thiamine (light blue) or Nicotinic acid (yellow) were excluded, there was  
33 no observed growth. The non-vitamin negative control is shown in magenta.

34

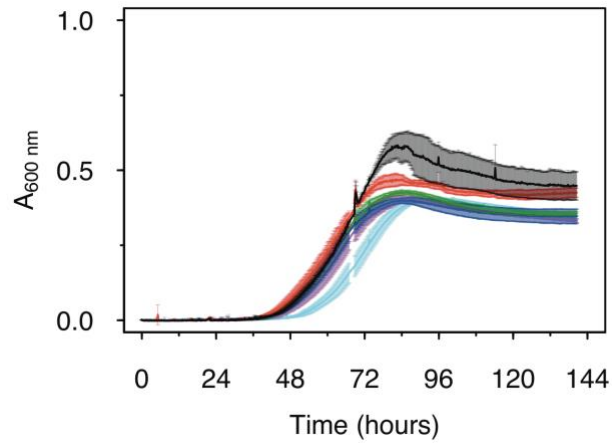

35

36 **Figure S2.** Growth of *Roseobacter sp. AzwK-3b* at different NaCl concentrations (all at 25 mM  
37 acetate). Growth curves from most conditions overlay considerably, and only the 150 mM  
38 condition (light blue) is notably slowing down *AzwK-3b* growth. The colours indicate the NaCl-  
39 conditions as follows: 428 mM (black; artificial seawater default), 350 mM (red), 300 mM  
40 (dark green), 250 mM (blue), 200 mM (purple, default in defined *AzwK-3b* medium used  
41 here), 150 mM (light blue).

42

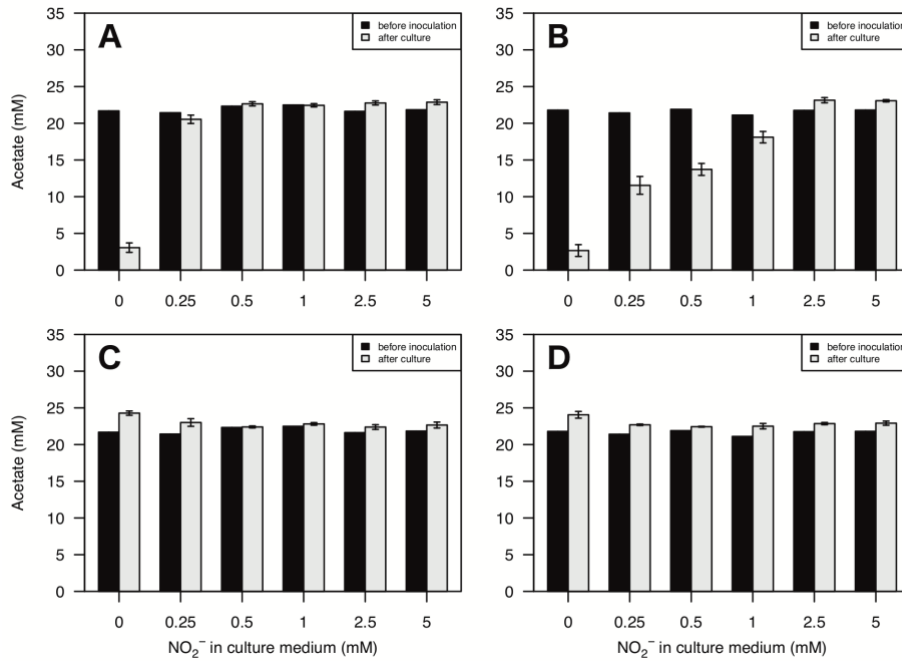

43

44 **Figure S3.** Acetate consumption in nitrite-inhibited cultures. The cultures presented in Figure  
 45 2 of the main text of the manuscript were analyzed by ion chromatography to determine the  
 46 acetate concentration before (black bars) and after (white bars) the AzwK-3b growth  
 47 experiment. The individual figures show the results for **A)** AzwK-3b inoculated, manganese-  
 48 free cultures; **B)** AzwK-3b inoculated, Mn<sup>II</sup>-supplemented cultures, **C)** non-inoculated,  
 49 manganese-free cultures, **D)** non-inoculated, Mn<sup>II</sup>-supplemented cultures. The concentration  
 50 of nitrite added to the culture medium is indicated on the x-axis, with “0” indicating the  
 51 nitrite-free (positive) controls.

52

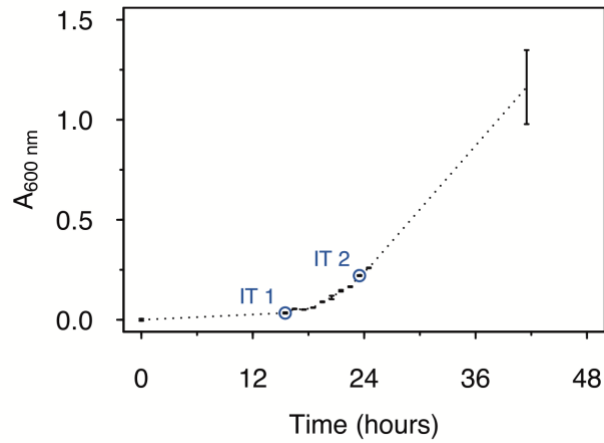

53

54 **Figure S4.** Pre-cultures used for the nitrite assay shown in Figure 3. Three 50 ml pre-cultures  
55 (no manganese, no nitrite) were grown and sampled at different time points as inoculum  
56 (mixing equal volumes of all three cultures). This inoculum was then 2x diluted with fresh  
57 medium, thereby introducing the +/- NO<sub>2</sub><sup>-</sup> and +/- Mn<sup>2+</sup>Cl<sub>2</sub> supplement (see Figure 3 in  
58 publication). Two time-points were chosen for preparation of an inoculum: IT 1 and IT 2, both  
59 of which were in the first third of the exponential phase.

60

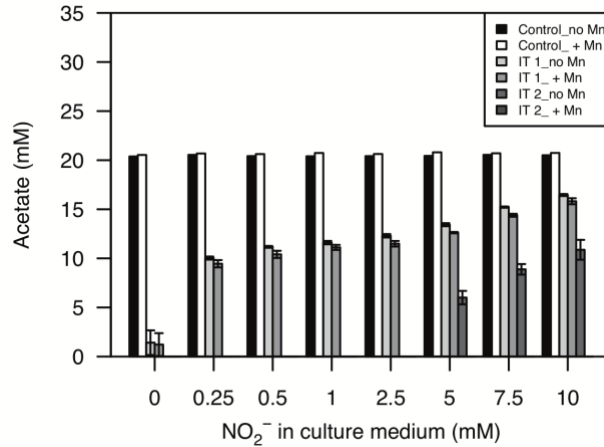

61

62 **Figure S5.** Acetate consumption confirms growth differences. The cultures presented in  
 63 Figure 3 were subjected to ion chromatography before and after culture of AzwK-3b. The  
 64 manganese free and Mn<sup>II</sup>-supplemented (non-inoculated) medium acetate-levels are shown  
 65 in black and white, respectively, and the earlier (IT 1) and later (IT 2) inocula +/- Mn<sup>II</sup> are  
 66 shown in increasingly dark grey bars as noted in the figure legend. Note that the Mn<sup>II</sup>-  
 67 supplemented IT 2 culture did not contain acetate above the detection threshold in any of  
 68 the nitrite-conditions and hence no bars are shown. The concentration of nitrite added to the  
 69 culture medium is shown on the x-axis, with "0" indicating the nitrite-free (positive) controls.

70

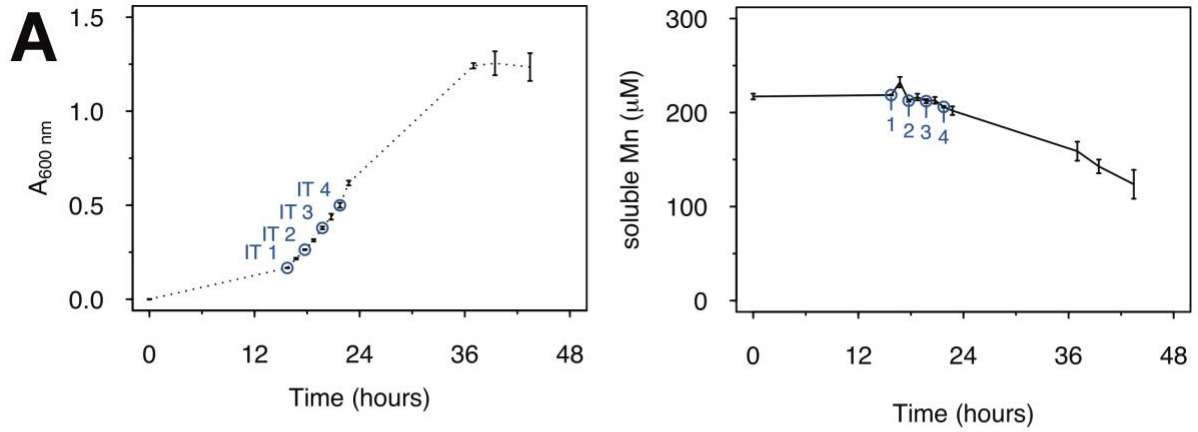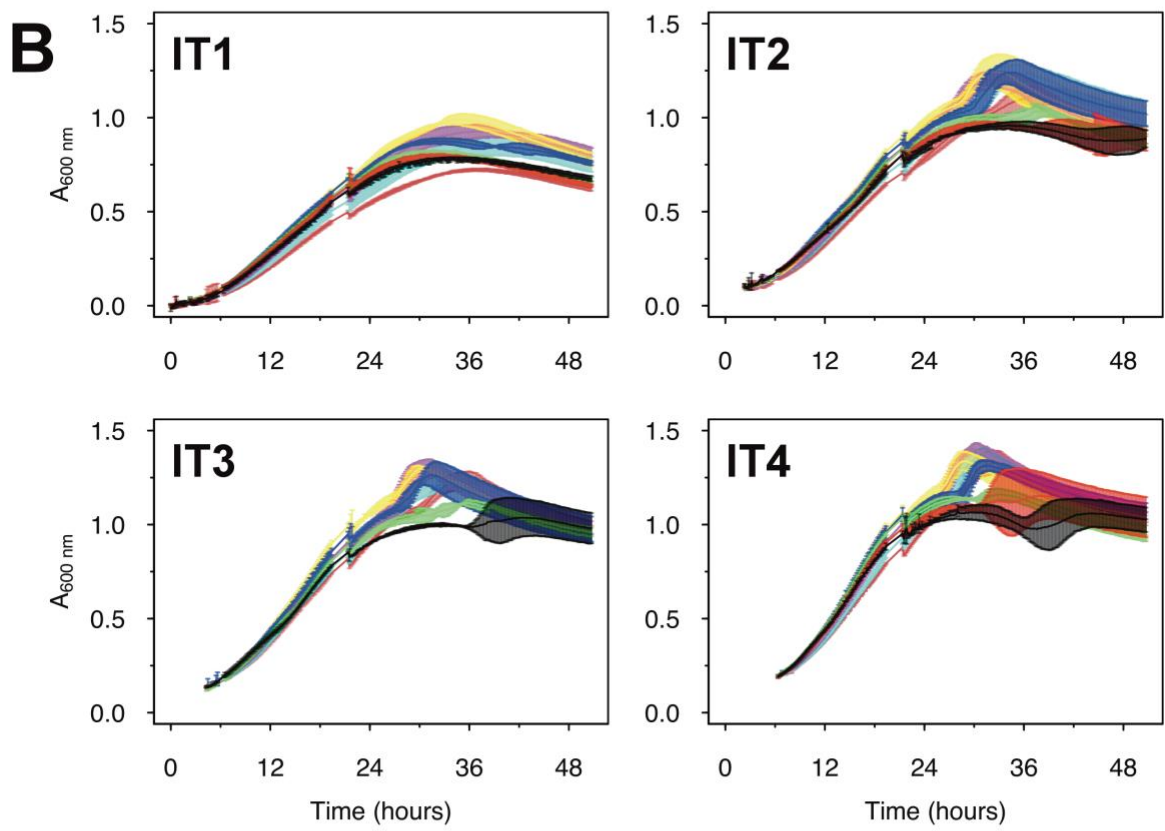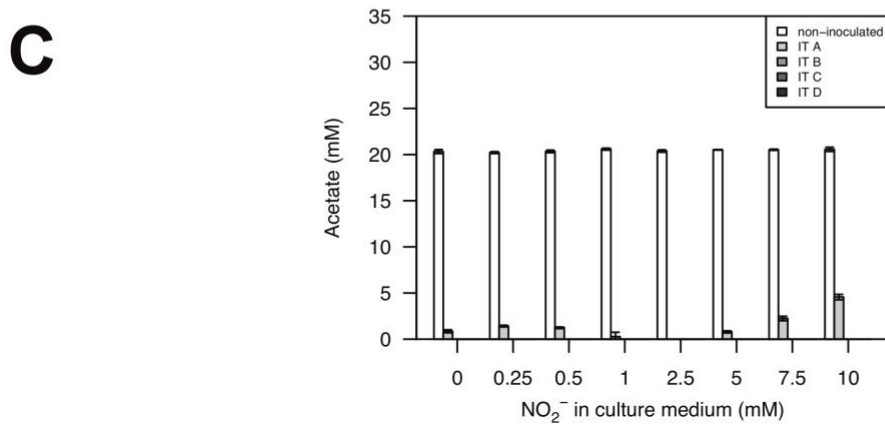



72 **Figure S6.** Supplementation of AzwK-3b pre-cultures with manganese helps overcoming the  
73 growth-inhibiting effects of nitrite. **(A)** A 50 ml pre-culture (200  $\mu\text{M}$   $\text{Mn}^{\text{II}}\text{Cl}_2$ , no nitrite) was  
74 grown (left) and manganese oxidation determined by quantifying soluble (residual)  $\text{Mn}^{\text{II}}$   
75 (right) (see Methods in the main text for quantification and experiment details). This culture  
76 was sampled at different time points (IT 1-4) as inoculum. This inoculum was then 2x diluted  
77 with fresh medium, introducing  $\text{Mn}^{\text{II}}\text{Cl}_2$  supplement and +/-  $\text{NO}_2^-$ . The growth curves of these  
78 inoculated cultures is shown in **(B)**. The nitrite concentrations were: Black – control no nitrite.  
79 Red – 0.25 mM nitrite. Green – 0.5 mM nitrite. Blue – 1 mM nitrite. Yellow – 2 mM nitrite.  
80 Magenta – 5 mM nitrite. Light blue – 7.5 mM nitrite. Dark red – 10 mM nitrite. **(C)** shows the  
81 acetate before (white bars) and after the growth of AzwK-3b at the different nitrite-  
82 concentrations (increasing greyscale for IT 1-4). The concentration of nitrite added to the  
83 culture medium is shown on the x-axis, with “0” indicating the nitrite-free (positive) controls.  
84 No bars are seen for IT 2-3, since acetate was below the detection limit in these samples.  
85

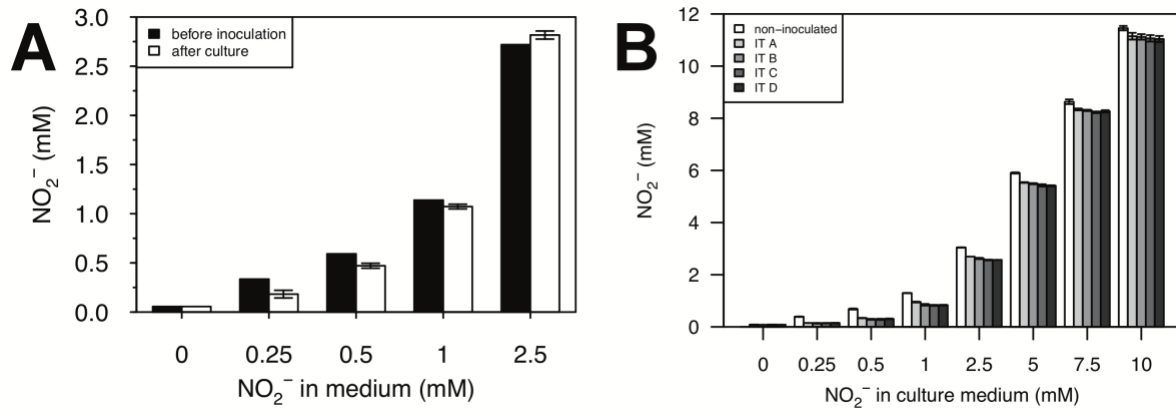

86

87 **Figure S7.** Nitrite conversion by AzwK-3b. Cultures reported in Figure 2 (non-dense inoculum)  
 88 **(A)** and Figure S6 (inoculated from MnII-supplemented pre-culture) **(B)** were analyzed. In **(A)**,  
 89 only the conditions up to 2.5 mM nitrite, in which no growth was seen anymore (see Figure  
 90 2), are reported. Nitrite was quantified before (black) and after (white) culturing AzwK-3b. In  
 91 **(B)**, white bars indicate the nitrite before culture, and the cultures of different inoculation  
 92 time point (IT 1-4) are indicated by bars in increasing greyscale. The concentration of nitrite  
 93 added to the culture medium is shown on the as x-axis, with "0" indicating the nitrite-free  
 94 (positive) controls.

95

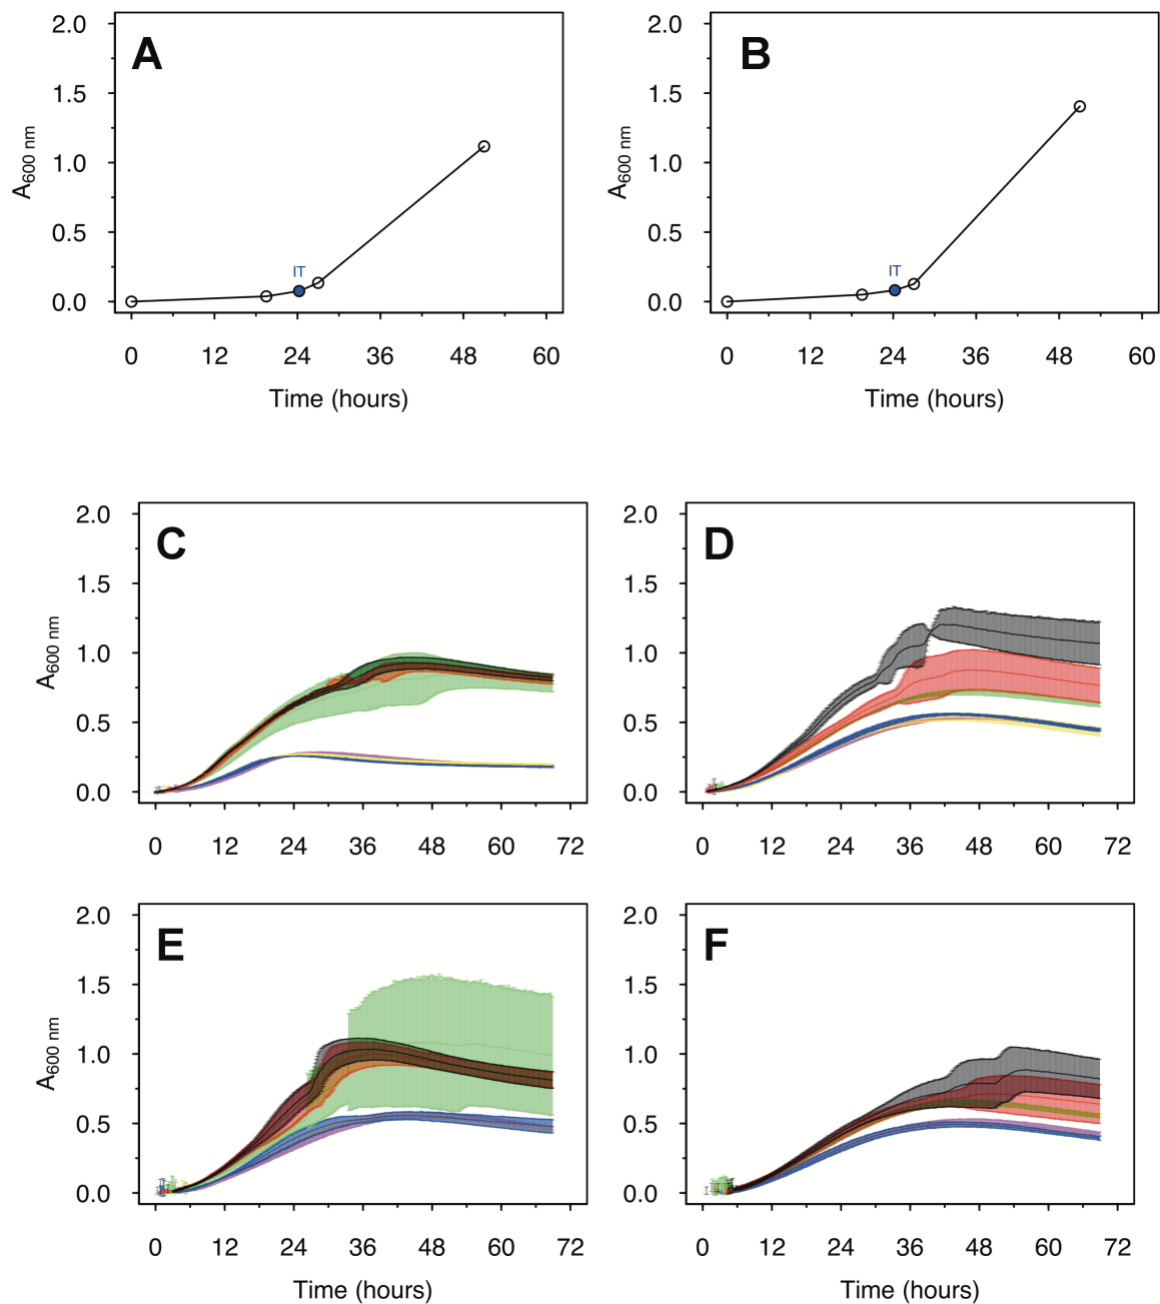

96

97 **Figure S8.** Effect of hydrogen peroxide on Azwk-3b. Growth curves from pre-cultures grown  
 98 without **(A)** or with **(B)** 200  $\mu\text{M}$  Mn<sup>II</sup> supplement. Different inocula were drawn from these  
 99 cultures at the time-points labeled "IT". These inocula were used for a hydrogen peroxide  
 100 exposure assay as follows: Cultures **(C)** and **(D)** were prepared from a manganese-free pre-  
 101 culture, and were subsequently grown without **(C)** or with **(D)** 200  $\mu\text{M}$  Mn<sup>II</sup> supplement.  
 102 Cultures **(E)** and **(F)** were prepared from the Mn<sup>II</sup>-supplemented pre-cultures, and **(F)** received  
 103 additional manganese supplement. Note that in this case, the Mn<sup>II</sup> supplement was in total  
 104 300  $\mu\text{M}$  (due to the manganese in the pre-culture), and in **(E)** the concentration of manganese

105 was 100  $\mu\text{M}$ . The nitrite-free controls containing 0, 50, and 100  $\mu\text{M}$   $\text{H}_2\text{O}_2$  are shown in black,  
106 red, and green, respectively. Cultures with additional 5 mM nitrite, and containing 0, 50, and  
107 100  $\mu\text{M}$   $\text{H}_2\text{O}_2$  are shown in blue, yellow and purple, respectively.
